# Supplementary material
Source: PubMed Central journal article supplement (PMC8738733)

Figure S1

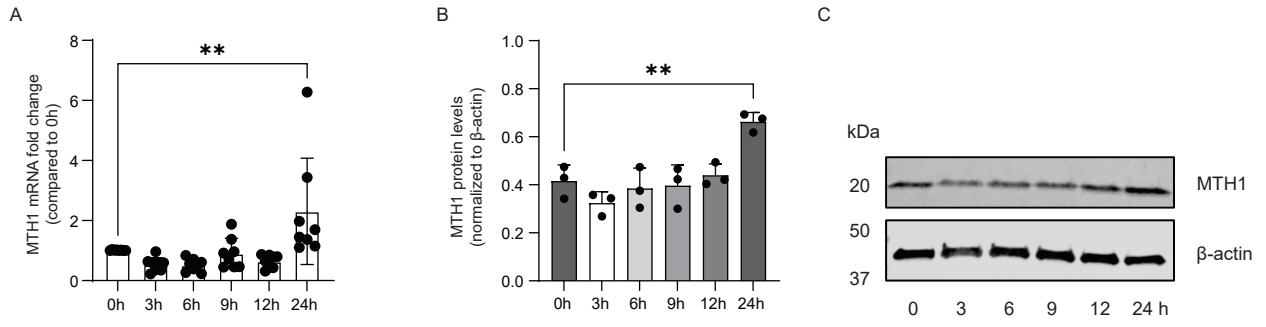

Figure S2

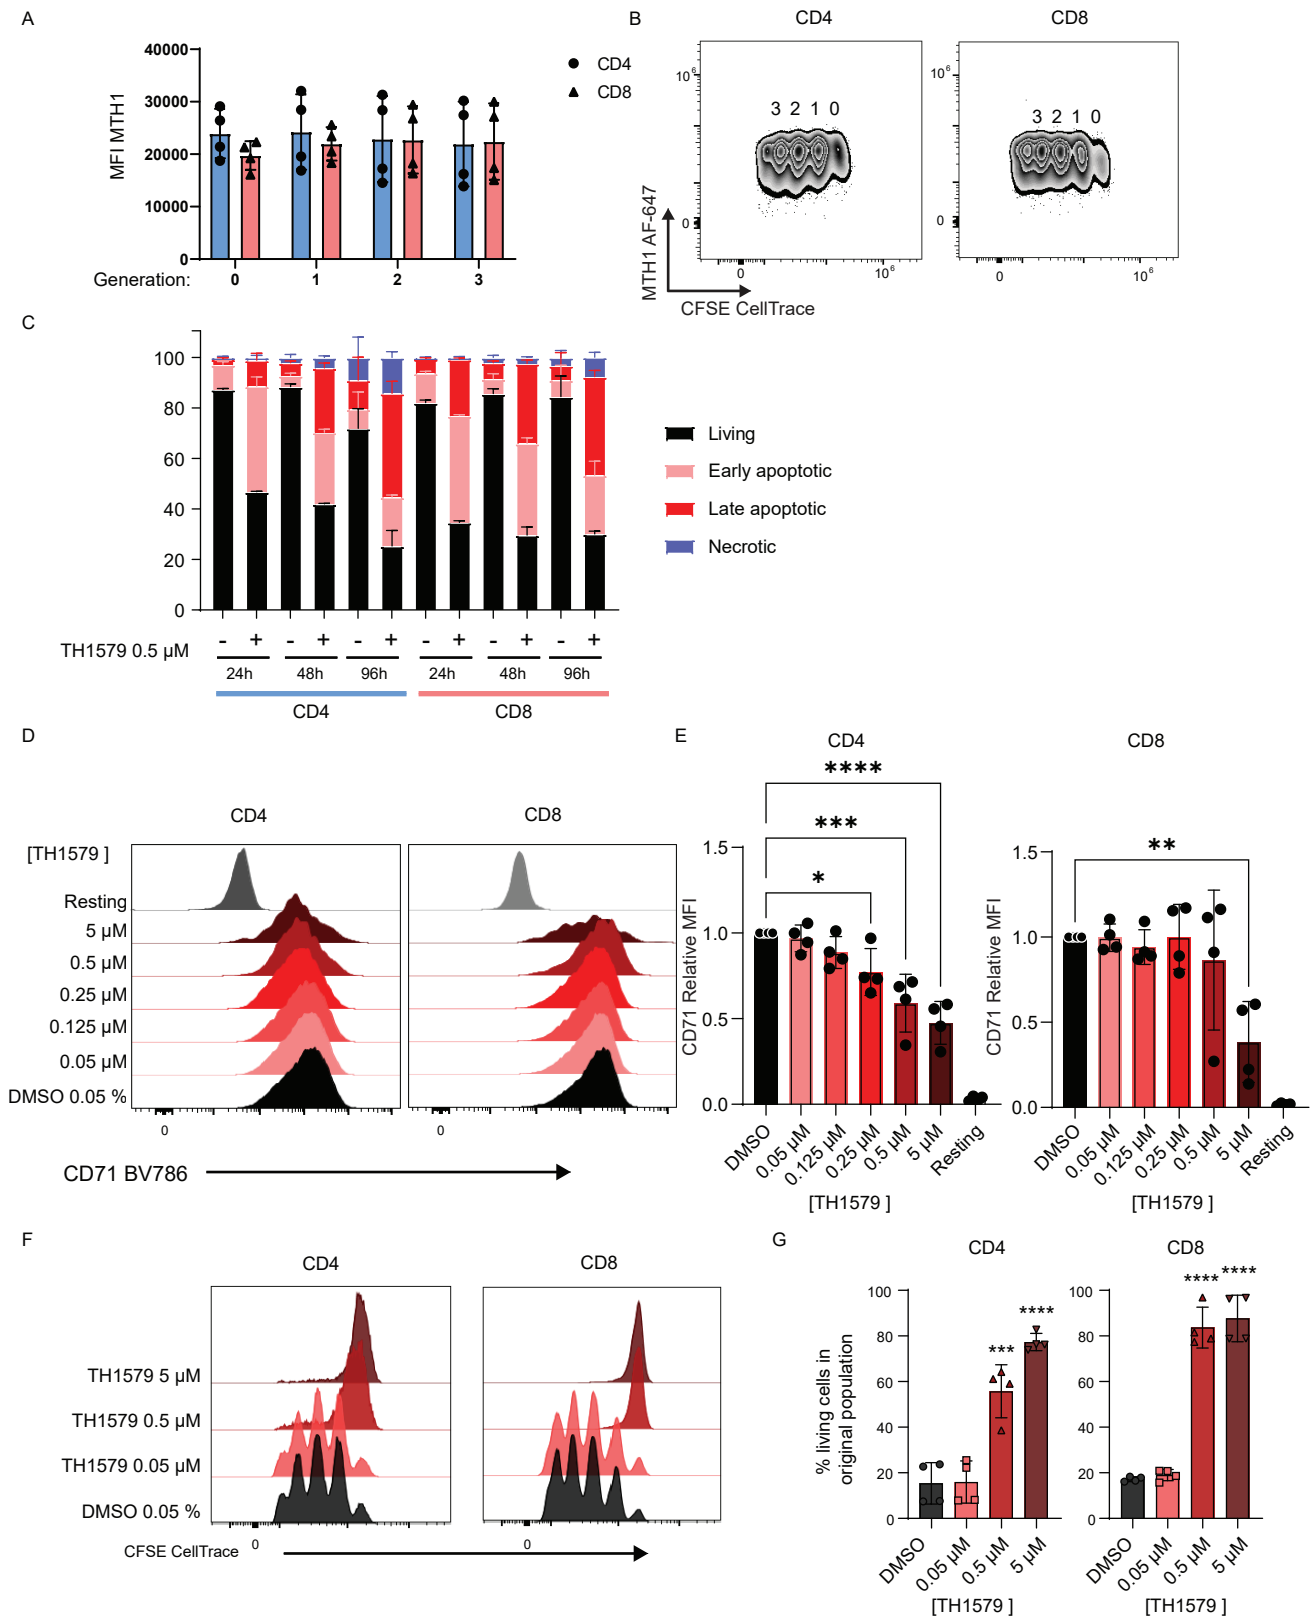

Figure S3

A

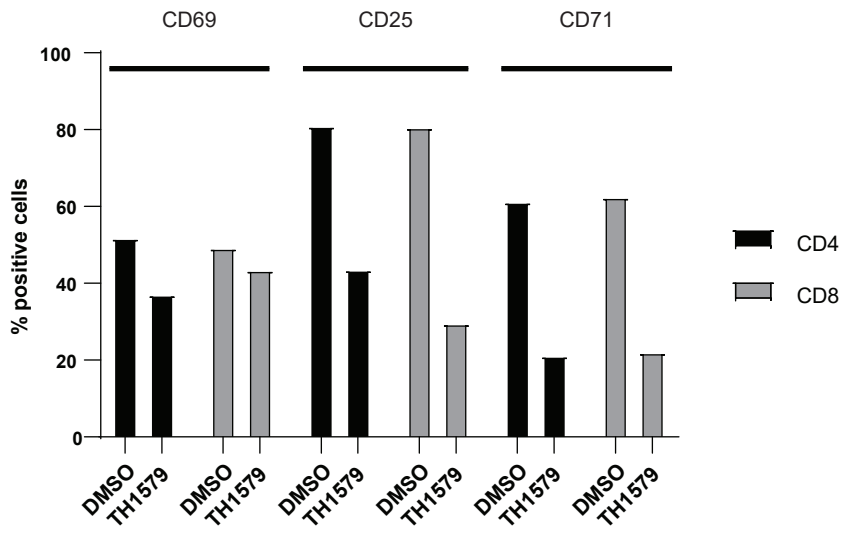

B

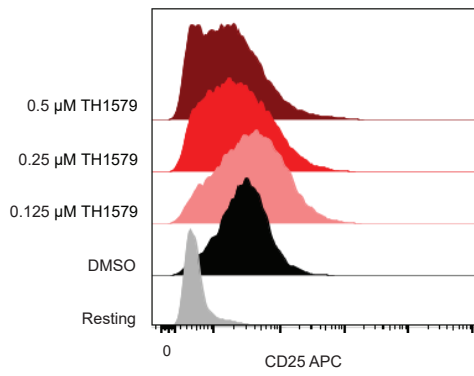

C

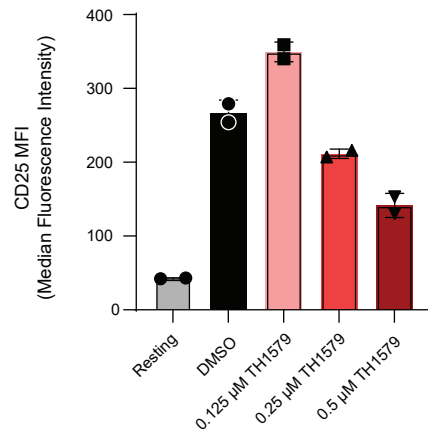

Figure S4

A 4h treatment

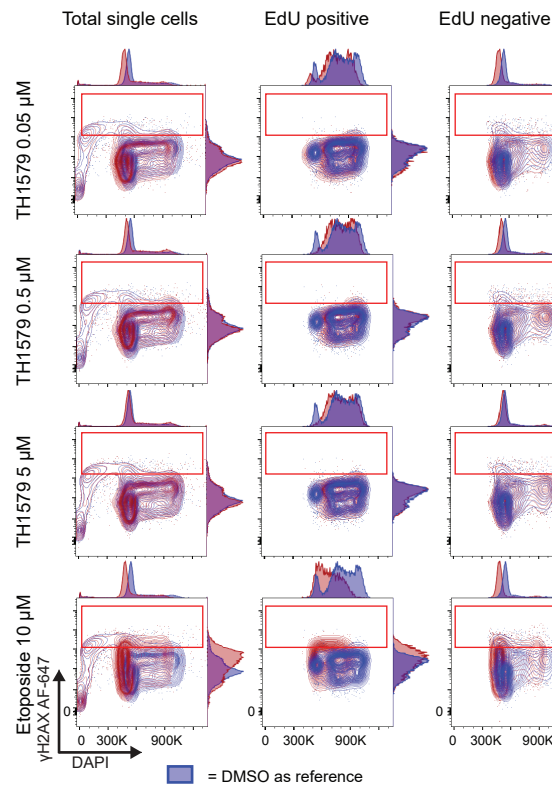

B 4h, Total

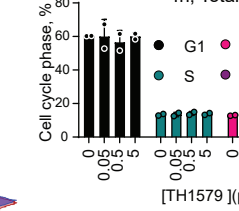

C 4h, EdU+

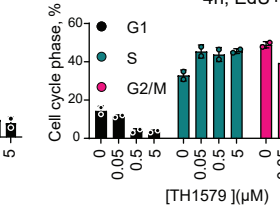

D 4h, EdU-

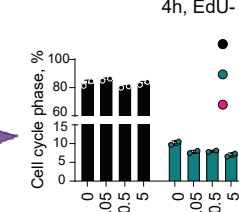

E 4h, Total

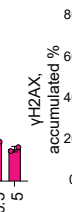

F 4h, EdU+

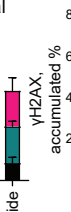

G 4h, EdU-

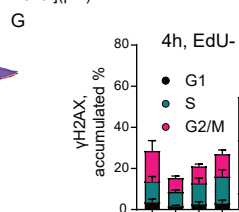

H 4h, Total

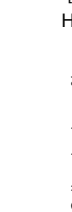

I 4h, EdU+

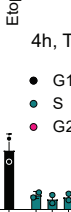

K 24h treatment

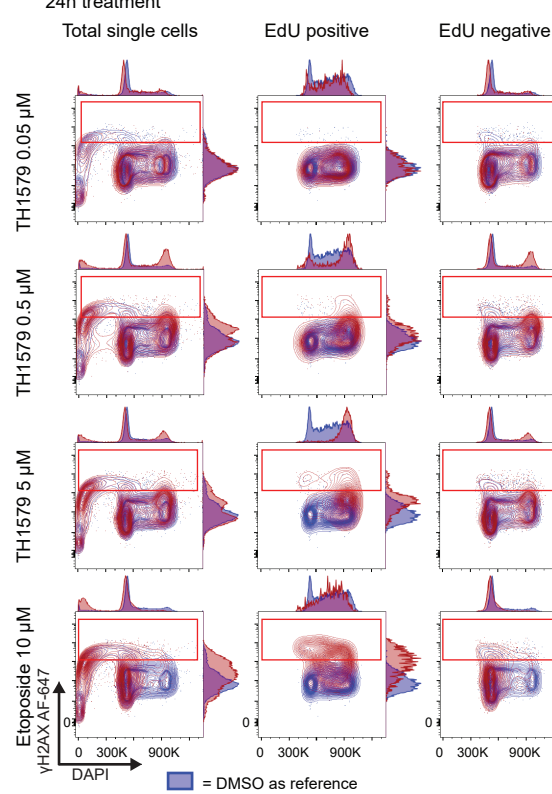

L 24h, EdU-

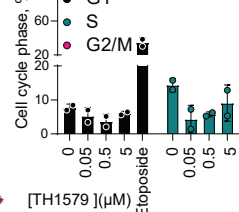

M 24h, Total

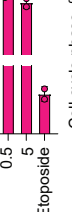

N 24h, EdU-

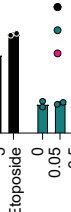

O 24h, Total

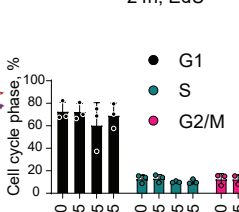

P 24h, EdU-

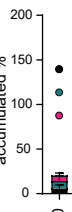

Figure S5

A

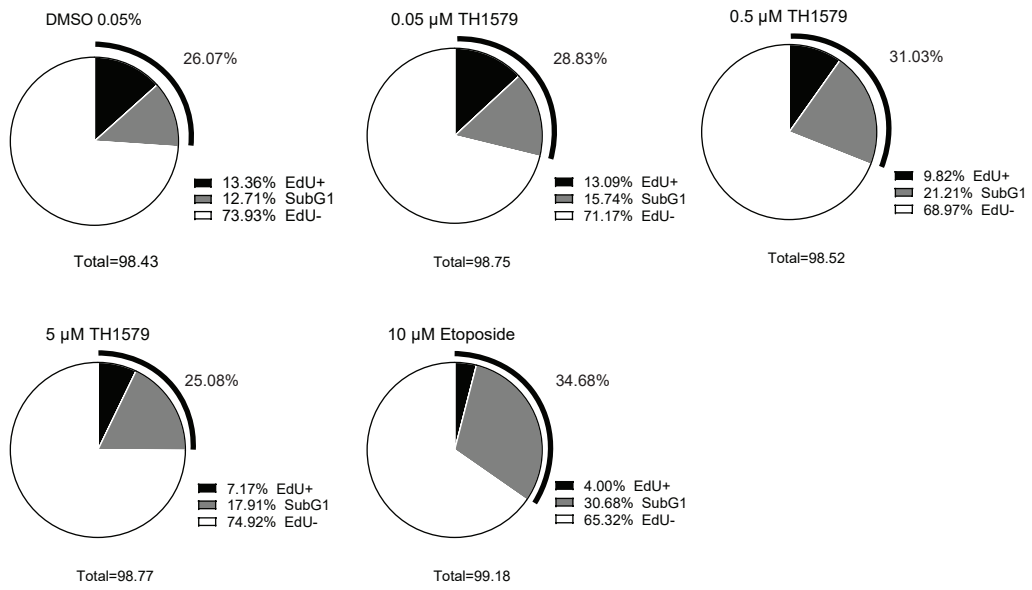

B

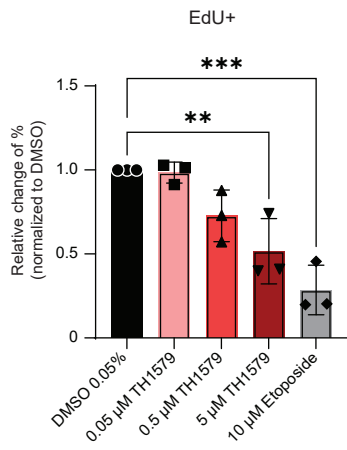

C

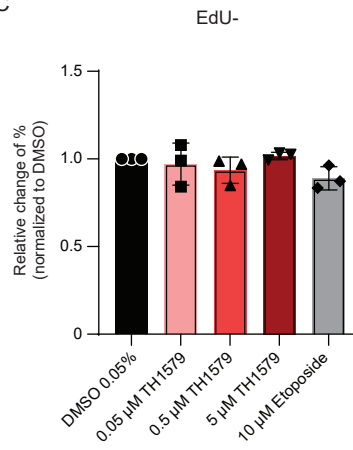

Figure S6

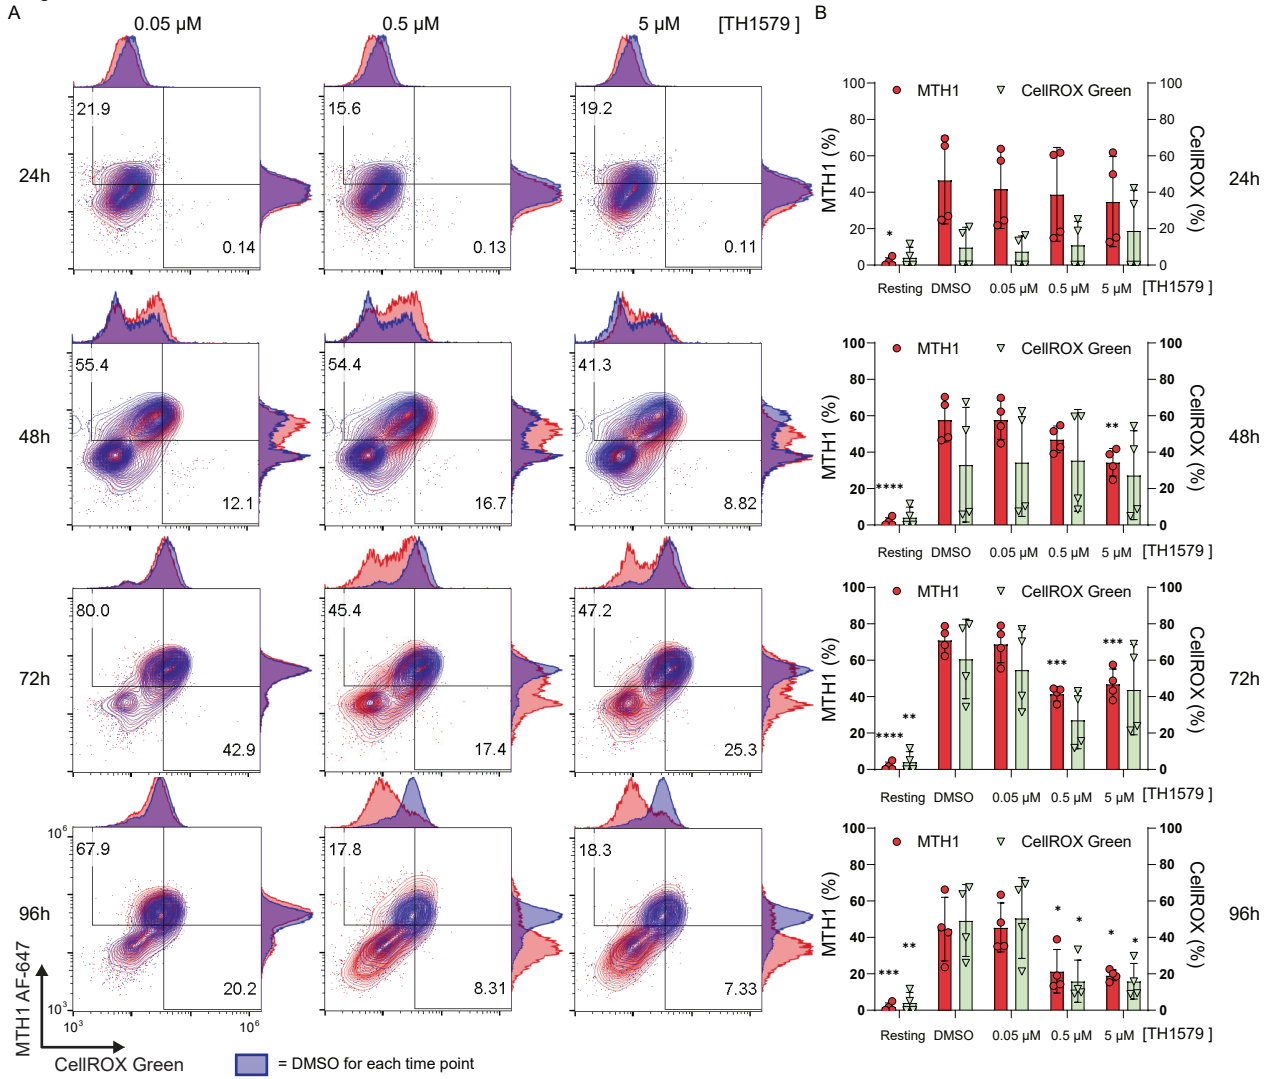

Figure S7

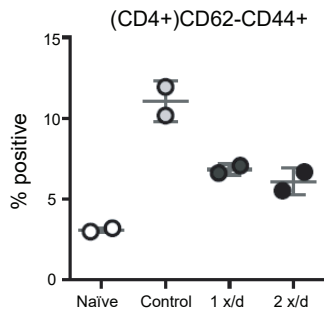

Figure S8

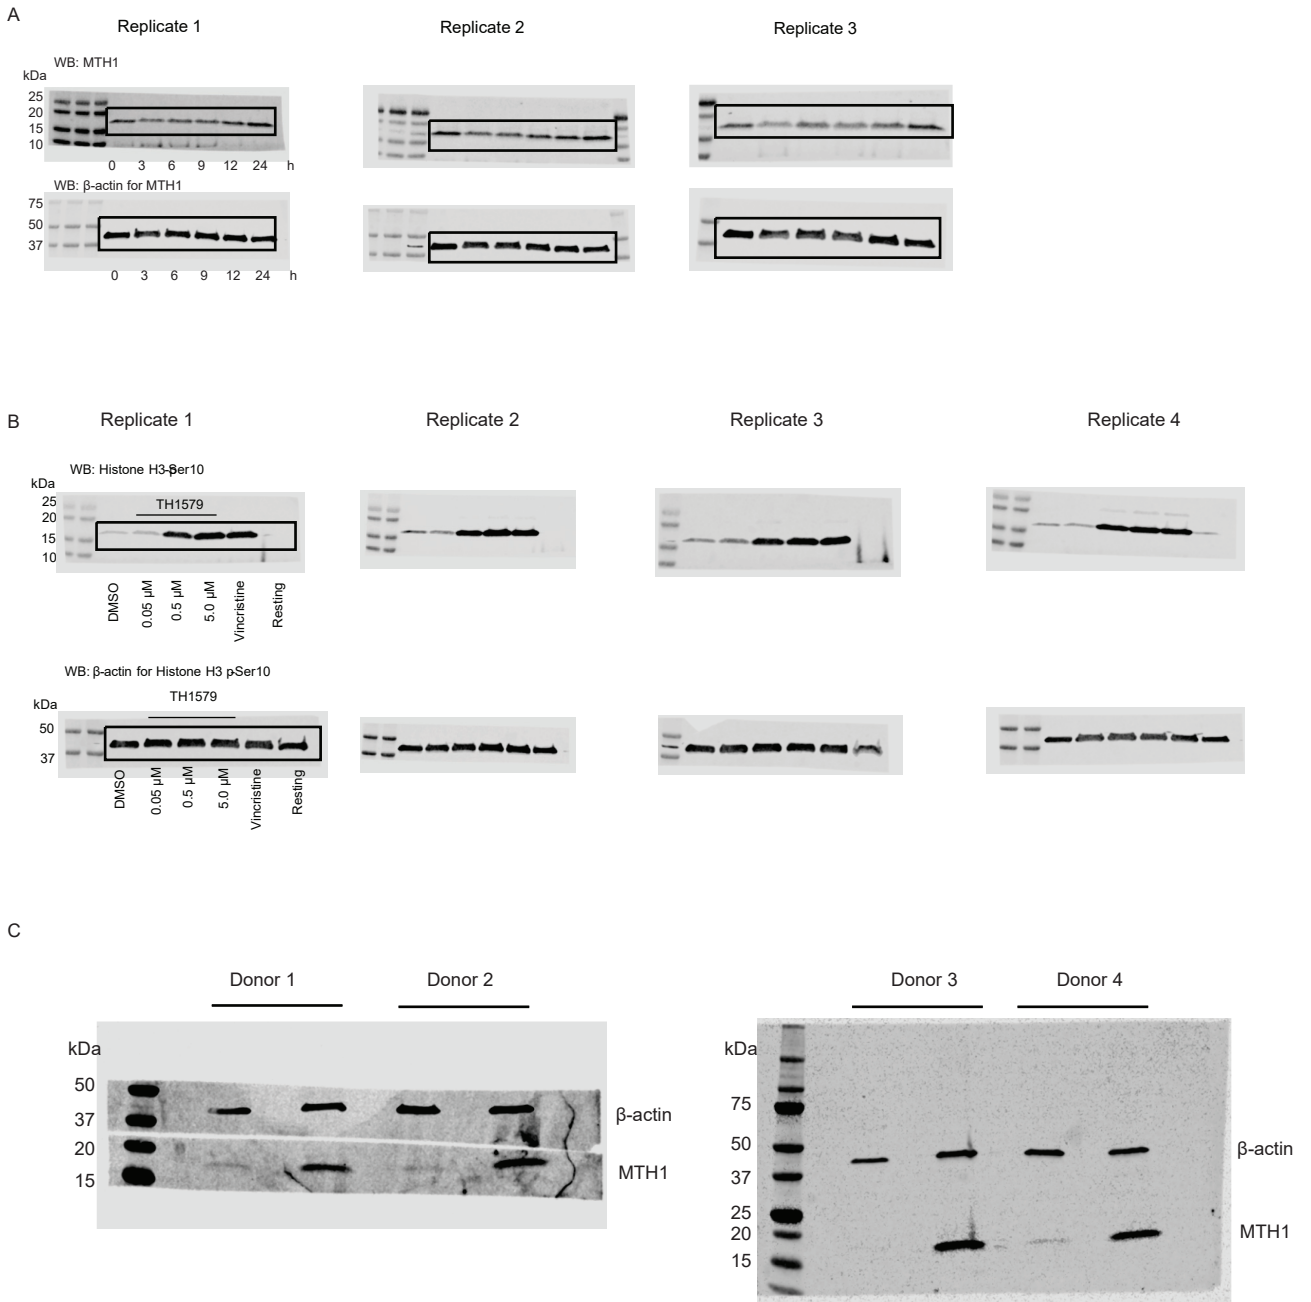

Supplement: 41418_2021_854_MOESM1_ESM.pdf [file 41418_2021_854_MOESM1_ESM.pdf]
